# Supplementary material for: Effect modifications of BMI transition and trajectory in the associations of adverse childhood experiences with new-onset dementia and its subtypes in older US adults
Source: PubMed Central journal article supplement — Gen Psychiatr. 2023 Aug 22;36(4):e101092. doi: 10.1136/gpsych-2023-101092 (PMC10445386; doi:10.1136/gpsych-2023-101092), 2023-08-22
Supplement: gpsych-2023-101092supp001.pdf [file gpsych-2023-101092supp001.pdf]

## Table Legends

|                                                                                                                                                                                                                                                             |    |
|-------------------------------------------------------------------------------------------------------------------------------------------------------------------------------------------------------------------------------------------------------------|----|
| Table S1. Definition of adverse childhood experiences in the Health and Retirement Study .....                                                                                                                                                              | 2  |
| Table S2. Fit statistics for body mass index trajectory during 2004-2010.....                                                                                                                                                                               | 3  |
| Table S3. Associations of adverse childhood experiences with baseline body mass index, body mass index transition, and body mass index trajectory: multinomial logistic regression .....                                                                    | 4  |
| Table S4. Longitudinal associations of adverse childhood experiences with new-onset all-cause dementia, Alzheimer's disease, and other dementias: Cox proportional hazard regression .....                                                                  | 5  |
| Table S5. Longitudinal associations of adverse childhood experiences with new-onset all-cause dementia, Alzheimer's disease, and other dementias in cognitively normal participants: sensitivity analysis based on Cox proportional hazard regression ..... | 7  |
| Table S6. Baseline body mass index-stratified longitudinal associations of adverse childhood experiences with new-onset all-cause dementia, Alzheimer's disease, and other dementias in men and women: Cox proportional hazard regression .....             | 8  |
| Table S7. Body mass index transition-stratified longitudinal associations of adverse childhood experiences with new-onset all-cause dementia, Alzheimer's disease, and other dementias: Cox proportional hazard regression .....                            | 9  |
| Table S8. Body mass index trajectory-stratified longitudinal associations of adverse childhood experiences with new-onset all-cause dementia, Alzheimer's disease, and other dementias: Cox proportional hazard regression .....                            | 12 |

Table S1. Definition of adverse childhood experiences in the Health and Retirement Study

| <b>Domains of ACEs</b>   | <b>Questionnaire Items</b>                                                                                                  | <b>Answers defined as exposure to the domain</b> |
|--------------------------|-----------------------------------------------------------------------------------------------------------------------------|--------------------------------------------------|
| Emotional neglect        | How much time and attention did your mother give you when you needed it?                                                    | a little/not at all                              |
|                          | How much effort did your mother put into watching over you and making sure you had a good upbringing?                       | a little/not at all                              |
| Parental substance abuse | Before you were 18 years old, did either of your parents drink or use drugs so often that it caused problems in the family? | yes                                              |
| Physical abuse           | Before you were 18 years old, were you ever physically abused by either of your parents?                                    | yes                                              |
| Economic adversity       | Would you say your family during that time was pretty well off financially, about average, or poor?                         | poor                                             |
| Downgrade                | Before you were 18 years old, did you have to do a year of school over again?                                               | yes                                              |
| Break the law            | Before you were 18 years old, were you ever in trouble with the police?                                                     | yes                                              |

Notes: ACEs, adverse childhood experiences.

Table S2. Fit statistics for body mass index trajectory during 2004-2010

| Number of classes                        | BIC             | AIC             | Class proportion          | Entropy      |
|------------------------------------------|-----------------|-----------------|---------------------------|--------------|
| <b>Normal weight in 2010 (N=3,505)</b>   |                 |                 |                           |              |
| 1                                        | 32443.61        | 32431.28        | 100.00%                   | 1.000        |
| 2                                        | 30344.34        | 30319.69        | 53.5%, 46.5%              | 0.762        |
| <b>3</b>                                 | <b>28989.03</b> | <b>28952.06</b> | <b>61.2%, 31.5%, 7.3%</b> | <b>0.868</b> |
| 4                                        | 28310.46        | 28261.16        | 43.5%, 37.0%, 15.5%, 4.0% | 0.831        |
| <b>Abnormal weight in 2010 (N=7,932)</b> |                 |                 |                           |              |
| 1                                        | 96170.95        | 96157           | 100.00%                   | 1.000        |
| 2                                        | 87408.72        | 87380.81        | 80.3%, 19.7%              | 0.936        |
| <b>3</b>                                 | <b>83069.71</b> | <b>83027.83</b> | <b>64.6%, 29.8%, 5.6%</b> | <b>0.916</b> |
| 4                                        | 80483.68        | 80427.85        | 48.2%, 34.8%, 14.2%, 2.8% | 0.895        |

Notes: BIC, Bayesian information criteria. AIC, Akaike's information criterion.

Table S3. Associations of adverse childhood experiences with baseline body mass index, body mass index transition, and body mass index trajectory: multinomial logistic regression

|                                                                                      | No. of participants | Number of ACEs |                         |                  |
|--------------------------------------------------------------------------------------|---------------------|----------------|-------------------------|------------------|
|                                                                                      |                     | 0              | 1                       | 2 or more        |
| OR (95% CI)                                                                          |                     |                |                         |                  |
| <b>Baseline BMI (Reference: Normal weight [BMI&lt;25 kg/m<sup>2</sup>], N=4,413)</b> |                     |                |                         |                  |
| Overweight (25≤BMI<30 kg/m <sup>2</sup> )                                            | 5,637               | Reference      | <b>1.15 (1.05-1.26)</b> | 1.08 (0.97-1.21) |
| Obesity (BMI≥30 kg/m <sup>2</sup> )                                                  | 5,232               | Reference      | 1.10 (0.99-1.22)        | 1.12 (0.99-1.25) |
| <b>BMI transition (Reference: Maintain normal weight, N=2,780)</b>                   |                     |                |                         |                  |
| Normal to abnormal weight                                                            | 831                 | Reference      | 1.14 (0.95-1.36)        | 1.09 (0.88-1.35) |
| Abnormal to normal weight                                                            | 738                 | Reference      | 0.99 (0.82-1.20)        | 0.97 (0.77-1.21) |
| Maintain overweight                                                                  | 2,934               | Reference      | 1.11 (0.98-1.26)        | 1.07 (0.92-1.23) |
| Overweight to obesity                                                                | 875                 | Reference      | 1.00 (0.84-1.20)        | 1.02 (0.83-1.25) |
| Maintain obesity                                                                     | 2,790               | Reference      | 1.06 (0.93-1.21)        | 1.11 (0.96-1.29) |
| Obesity to overweight                                                                | 544                 | Reference      | 1.12 (0.89-1.38)        | 1.10 (0.86-1.41) |
| <b>BMI trajectory (Reference: Maintain normal weight, N=3,256)</b>                   |                     |                |                         |                  |
| Decline to normal weight                                                             | 249                 | Reference      | 1.01 (0.75-1.36)        | 0.89 (0.62-1.27) |
| Maintain overweight                                                                  | 5,140               | Reference      | 1.11 (0.99-1.23)        | 1.08 (0.95-1.22) |
| Maintain obesity                                                                     | 2,792               | Reference      | 1.06 (0.93-1.20)        | 1.08 (0.94-1.25) |

Notes: ACEs, adverse childhood experiences. OR, odds ratio. CI, confidence interval. Models were adjusted for age, sex, race, education, household income, marital status, smoking history, drinking history, and number of chronic diseases. Bolded refers to statistically significant.

Table S4. Longitudinal associations of adverse childhood experiences with new-onset all-cause dementia, Alzheimer's disease, and other dementias: Cox proportional hazard regression

| Number of ACEs            | Cases/No. of participants | Model 1                 | Model 2                 | Model 3                 |
|---------------------------|---------------------------|-------------------------|-------------------------|-------------------------|
|                           |                           | HR (95% CI)             |                         |                         |
| <b>Total (N=15,282)</b>   |                           |                         |                         |                         |
| <b>All-cause dementia</b> |                           |                         |                         |                         |
| 0                         | 442/6773                  | 1.00 (0.90-1.11)        | 1.00 (0.90-1.11)        | 1.00 (0.90-1.11)        |
| 1                         | 371/4894                  | <b>1.14 (1.03-1.27)</b> | <b>1.13 (1.03-1.25)</b> | <b>1.14 (1.03-1.26)</b> |
| 2 or more                 | 274/3615                  | <b>1.37 (1.21-1.54)</b> | <b>1.35 (1.19-1.52)</b> | <b>1.36 (1.20-1.53)</b> |
| <b>AD</b>                 |                           |                         |                         |                         |
| 0                         | 182/6773                  | 1.00 (0.86-1.16)        | 1.00 (0.86-1.16)        | 1.00 (0.86-1.16)        |
| 1                         | 141/4894                  | 1.01 (0.86-1.19)        | 1.02 (0.86-1.20)        | 1.02 (0.86-1.20)        |
| 2 or more                 | 89/3615                   | 1.05 (0.85-1.30)        | 1.06 (0.86-1.31)        | 1.07 (0.87-1.32)        |
| <b>Other dementias</b>    |                           |                         |                         |                         |
| 0                         | 260/6773                  | 1.00 (0.88-1.13)        | 1.00 (0.88-1.13)        | 1.00 (0.88-1.13)        |
| 1                         | 230/4894                  | <b>1.23 (1.08-1.40)</b> | <b>1.21 (1.06-1.37)</b> | <b>1.21 (1.07-1.38)</b> |
| 2 or more                 | 185/3615                  | <b>1.59 (1.37-1.84)</b> | <b>1.54 (1.33-1.78)</b> | <b>1.55 (1.34-1.80)</b> |
| <b>Men (N=6,395)</b>      |                           |                         |                         |                         |
| <b>All-cause dementia</b> |                           |                         |                         |                         |
| 0                         | 146/2564                  | 1.00 (0.86-1.16)        | 1.00 (0.86-1.16)        | 1.00 (0.86-1.16)        |
| 1                         | 173/2152                  | <b>1.29 (1.10-1.50)</b> | <b>1.28 (1.09-1.49)</b> | <b>1.28 (1.10-1.50)</b> |
| 2 or more                 | 132/1679                  | <b>1.30 (1.07-1.58)</b> | <b>1.29 (1.05-1.57)</b> | <b>1.30 (1.06-1.58)</b> |
| <b>AD</b>                 |                           |                         |                         |                         |
| 0                         | 57/2564                   | 1.00 (0.79-1.27)        | 1.00 (0.79-1.27)        | 1.00 (0.79-1.27)        |
| 1                         | 66/2152                   | 1.06 (0.81-1.38)        | 1.06 (0.81-1.37)        | 1.06 (0.82-1.38)        |
| 2 or more                 | 42/1679                   | 1.06 (0.76-1.49)        | 1.07 (0.77-1.50)        | 1.08 (0.77-1.51)        |
| <b>Other dementias</b>    |                           |                         |                         |                         |
| 0                         | 89/2564                   | 1.00 (0.82-1.21)        | 1.00 (0.82-1.22)        | 1.00 (0.82-1.22)        |
| 1                         | 107/2152                  | <b>1.42 (1.17-1.72)</b> | <b>1.41 (1.16-1.71)</b> | <b>1.42 (1.17-1.71)</b> |
| 2 or more                 | 90/1679                   | <b>1.44 (1.13-1.84)</b> | <b>1.42 (1.11-1.81)</b> | <b>1.43 (1.12-1.82)</b> |
| <b>Women (N=8,887)</b>    |                           |                         |                         |                         |
| <b>All-cause dementia</b> |                           |                         |                         |                         |
| 0                         | 296/4209                  | 1.00 (0.88-1.13)        | 1.00 (0.88-1.13)        | 1.00 (0.88-1.13)        |
| 1                         | 198/2742                  | 1.06 (0.92-1.21)        | 1.05 (0.92-1.20)        | 1.06 (0.92-1.21)        |
| 2 or more                 | 142/1936                  | <b>1.42 (1.22-1.65)</b> | <b>1.40 (1.20-1.63)</b> | <b>1.41 (1.21-1.65)</b> |
| <b>AD</b>                 |                           |                         |                         |                         |
| 0                         | 125/4209                  | 1.00 (0.83-1.21)        | 1.00 (0.83-1.21)        | 1.00 (0.83-1.21)        |
| 1                         | 75/2742                   | 0.97 (0.79-1.20)        | 0.98 (0.80-1.21)        | 0.99 (0.80-1.22)        |
| 2 or more                 | 47/1936                   | 1.03 (0.78-1.35)        | 1.05 (0.80-1.38)        | 1.06 (0.81-1.40)        |
| <b>Other dementias</b>    |                           |                         |                         |                         |
| 0                         | 171/4209                  | 1.00 (0.85-1.17)        | 1.00 (0.85-1.18)        | 1.00 (0.85-1.18)        |
| 1                         | 123/2742                  | 1.11 (0.94-1.32)        | 1.09 (0.92-1.30)        | 1.10 (0.92-1.30)        |
| 2 or more                 | 95/1936                   | <b>1.69 (1.41-2.03)</b> | <b>1.63 (1.36-1.96)</b> | <b>1.65 (1.37-1.98)</b> |

Notes: ACEs, adverse childhood experiences. AD, Alzheimer's disease. HR, hazard ratio. CI, confidence interval. Model 1 was adjusted for age, sex, race, education, household income, and marital status. Model 2 was further adjusted for smoking history, drinking history, and number of chronic diseases based on model 1. Model 3 was further adjusted for baseline body mass index based on Model 2. **Bolded** refers to statistically significant.

Table S5. Longitudinal associations of adverse childhood experiences with new-onset all-cause dementia, Alzheimer's disease, and other dementias in cognitively normal participants: sensitivity analysis based on Cox proportional hazard regression

| Number of ACEs            | Cases/No. of participants | Model 1                 | Model 2                 | Model 3                 |
|---------------------------|---------------------------|-------------------------|-------------------------|-------------------------|
|                           |                           | HR (95% CI)             |                         |                         |
| <b>All-cause dementia</b> |                           |                         |                         |                         |
| 0                         | 349/6129                  | 1.00 (0.90-1.11)        | 1.00 (0.90-1.11)        | 1.00 (0.90-1.11)        |
| 1                         | 284/4342                  | <b>1.14 (1.01-1.27)</b> | 1.12 (1.00-1.26)        | 1.13 (1.00-1.26)        |
| 2 or more                 | 210/3180                  | <b>1.36 (1.19-1.56)</b> | <b>1.33 (1.16-1.53)</b> | <b>1.34 (1.17-1.54)</b> |
| <b>AD</b>                 |                           |                         |                         |                         |
| 0                         | 134/6129                  | 1.00 (0.84-1.19)        | 1.00 (0.84-1.19)        | 1.00 (0.84-1.19)        |
| 1                         | 99/4342                   | 0.99 (0.82-1.21)        | 0.99 (0.82-1.21)        | 1.00 (0.82-1.21)        |
| 2 or more                 | 66/3180                   | 1.09 (0.85-1.39)        | 1.09 (0.85-1.39)        | 1.09 (0.86-1.40)        |
| <b>Other dementias</b>    |                           |                         |                         |                         |
| 0                         | 215/6129                  | 1.00 (0.87-1.15)        | 1.00 (0.87-1.15)        | 1.00 (0.87-1.15)        |
| 1                         | 185/4342                  | <b>1.22 (1.06-1.41)</b> | <b>1.20 (1.04-1.38)</b> | <b>1.21 (1.05-1.39)</b> |
| 2 or more                 | 144/3180                  | <b>1.53 (1.30-1.81)</b> | <b>1.48 (1.25-1.75)</b> | <b>1.49 (1.26-1.76)</b> |

Notes: ACEs, adverse childhood experiences. AD, Alzheimer's disease. HR, hazard ratio. CI, confidence interval. Model 1 was adjusted for age, sex, race, education, household income, and marital status. Model 2 was further adjusted for smoking history, drinking history, and number of chronic diseases based on model 1. Model 3 was further adjusted for baseline body mass index based on Model 2. Bolded refers to statistically significant.

Table S6. Baseline body mass index-stratified longitudinal associations of adverse childhood experiences with new-onset all-cause dementia, Alzheimer's disease, and other dementias in men and women: Cox proportional hazard regression

|                                                   | No. of cases | Number of ACEs   |                         |                         |
|---------------------------------------------------|--------------|------------------|-------------------------|-------------------------|
|                                                   |              | 0                | 1                       | 2 or more               |
| HR (95% CI)                                       |              |                  |                         |                         |
| Men (N=6,395)                                     |              |                  |                         |                         |
| <b>Normal weight (BMI&lt;25 kg/m<sup>2</sup>)</b> |              |                  |                         |                         |
| All-cause dementia                                | 156          | 1.00 (0.77-1.29) | <b>1.42 (1.11-1.83)</b> | 1.15 (0.81-1.63)        |
| AD                                                | 53           | 1.00 (0.65-1.53) | 1.42 (0.95-2.10)        | 0.48 (0.20-1.15)        |
| Other dementias                                   | 103          | 1.00 (0.72-1.38) | 1.35 (0.98-1.87)        | <b>1.55 (1.06-2.28)</b> |
| <b>Overweight (25≤BMI&lt;30 kg/m<sup>2</sup>)</b> |              |                  |                         |                         |
| All-cause dementia                                | 181          | 1.00 (0.76-1.32) | <b>1.37 (1.09-1.72)</b> | <b>1.59 (1.21-2.08)</b> |
| AD                                                | 73           | 1.00 (0.64-1.57) | <b>1.48 (1.04-2.11)</b> | <b>1.67 (1.09-2.54)</b> |
| Other dementias                                   | 108          | 1.00 (0.71-1.42) | 1.27 (0.94-1.71)        | <b>1.53 (1.08-2.17)</b> |
| <b>Obesity (BMI≥30 kg/m<sup>2</sup>)</b>          |              |                  |                         |                         |
| All-cause dementia                                | 114          | 1.00 (0.70-1.44) | 1.33 (0.97-1.82)        | <b>1.96 (1.45-2.64)</b> |
| AD                                                | 39           | 1.00 (0.59-1.70) | 0.73 (0.39-1.35)        | 1.38 (0.81-2.33)        |
| Other dementias                                   | 75           | 1.00 (0.61-1.64) | <b>1.87 (1.30-2.71)</b> | <b>2.45 (1.70-3.53)</b> |
| Women (N=8,887)                                   |              |                  |                         |                         |
| <b>Normal weight (BMI&lt;25 kg/m<sup>2</sup>)</b> |              |                  |                         |                         |
| All-cause dementia                                | 278          | 1.00 (0.85-1.18) | 0.93 (0.74-1.15)        | 0.94 (0.70-1.27)        |
| AD                                                | 117          | 1.00 (0.78-1.28) | 0.84 (0.59-1.18)        | 0.73 (0.44-1.22)        |
| Other dementias                                   | 161          | 1.00 (0.80-1.25) | 1.00 (0.75-1.33)        | 1.12 (0.78-1.62)        |
| <b>Overweight (25≤BMI&lt;30 kg/m<sup>2</sup>)</b> |              |                  |                         |                         |
| All-cause dementia                                | 193          | 1.00 (0.79-1.26) | 1.23 (0.97-1.56)        | <b>1.77 (1.33-2.36)</b> |
| AD                                                | 64           | 1.00 (0.69-1.44) | 0.93 (0.61-1.42)        | 1.08 (0.61-1.93)        |
| Other dementias                                   | 129          | 1.00 (0.74-1.35) | <b>1.41 (1.06-1.88)</b> | <b>2.14 (1.54-2.97)</b> |
| <b>Obesity (BMI≥30 kg/m<sup>2</sup>)</b>          |              |                  |                         |                         |
| All-cause dementia                                | 165          | 1.00 (0.78-1.28) | 1.02 (0.78-1.34)        | <b>1.38 (1.02-1.87)</b> |
| AD                                                | 66           | 1.00 (0.67-1.49) | 1.09 (0.71-1.67)        | 1.48 (0.95-2.31)        |
| Other dementias                                   | 99           | 1.00 (0.73-1.36) | 0.98 (0.68-1.39)        | 1.19 (0.81-1.75)        |

Notes: ACEs, adverse childhood experiences. BMI, body mass index. AD, Alzheimer's disease. HR, hazard ratio. CI, confidence interval. Models was adjusted for age, race, education, household income, marital status, smoking history, drinking history, number of chronic diseases, and baseline BMI. Bolded refers to statistically significant.



Table S7. Body mass index transition-stratified longitudinal associations of adverse childhood experiences with new-onset all-cause dementia, Alzheimer's disease, and other dementias: Cox proportional hazard regression

| Number of ACEs                                           | Cases/No. of participants | Model 1                 | Model 2                 | Model 3                 |
|----------------------------------------------------------|---------------------------|-------------------------|-------------------------|-------------------------|
|                                                          |                           | HR (95% CI)             |                         |                         |
| <b>All-cause dementia</b>                                |                           |                         |                         |                         |
| <b>p for interaction between ACEs and BMI transition</b> |                           | <b>0.012</b>            | <b>0.009</b>            | <b>0.008</b>            |
| <b>Maintain obesity</b>                                  |                           |                         |                         |                         |
| 0                                                        | 57/1168                   | 1.00 (0.77-1.30)        | 1.00 (0.77-1.30)        | 1.00 (0.77-1.30)        |
| 1                                                        | 56/894                    | 1.20 (0.92-1.55)        | 1.18 (0.91-1.54)        | 1.18 (0.91-1.54)        |
| 2 or more                                                | 59/728                    | <b>1.76 (1.36-2.28)</b> | <b>1.78 (1.37-2.31)</b> | <b>1.78 (1.37-2.31)</b> |
| <b>Maintain overweight</b>                               |                           |                         |                         |                         |
| 0                                                        | 72/1312                   | 1.00 (0.79-1.27)        | 1.00 (0.79-1.27)        | 1.00 (0.79-1.27)        |
| 1                                                        | 83/996                    | <b>1.39 (1.12-1.72)</b> | <b>1.39 (1.12-1.72)</b> | <b>1.38 (1.12-1.71)</b> |
| 2 or more                                                | 64/626                    | <b>1.98 (1.54-2.53)</b> | <b>1.95 (1.52-2.50)</b> | <b>1.94 (1.51-2.50)</b> |
| <b>Obesity to overweight</b>                             |                           |                         |                         |                         |
| 0                                                        | 18/223                    | 1.00 (0.62-1.62)        | 1.00 (0.62-1.62)        | 1.00 (0.62-1.62)        |
| 1                                                        | 23/188                    | <b>1.57 (1.04-2.37)</b> | <b>1.60 (1.07-2.42)</b> | <b>1.59 (1.05-2.41)</b> |
| 2 or more                                                | 15/133                    | <b>1.74 (1.04-2.92)</b> | <b>1.76 (1.03-3.00)</b> | <b>1.76 (1.03-3.00)</b> |
| <b>Overweight to obesity</b>                             |                           |                         |                         |                         |
| 0                                                        | 22/404                    | 1.00 (0.64-1.55)        | 1.00 (0.64-1.55)        | 1.00 (0.64-1.56)        |
| 1                                                        | 14/272                    | 1.07 (0.63-1.79)        | 1.08 (0.64-1.84)        | 1.07 (0.63-1.81)        |
| 2 or more                                                | 13/199                    | 1.36 (0.78-2.39)        | 1.32 (0.75-2.33)        | 1.26 (0.71-2.23)        |
| <b>Maintain normal weight</b>                            |                           |                         |                         |                         |
| 0                                                        | 156/1433                  | 1.00 (0.85-1.18)        | 1.00 (0.85-1.18)        | 1.00 (0.85-1.18)        |
| 1                                                        | 88/846                    | 0.98 (0.80-1.21)        | 0.98 (0.80-1.21)        | 0.98 (0.80-1.21)        |
| 2 or more                                                | 48/501                    | 0.98 (0.74-1.31)        | 0.99 (0.74-1.32)        | 0.99 (0.74-1.32)        |
| <b>Normal to abnormal weight</b>                         |                           |                         |                         |                         |
| 0                                                        | 27/381                    | 1.00 (0.67-1.49)        | 1.00 (0.67-1.49)        | 1.00 (0.67-1.49)        |
| 1                                                        | 25/275                    | 1.01 (0.68-1.49)        | 0.98 (0.66-1.44)        | 0.98 (0.66-1.44)        |
| 2 or more                                                | 14/175                    | 0.99 (0.58-1.69)        | 0.93 (0.54-1.59)        | 0.93 (0.54-1.60)        |
| <b>Abnormal to normal weight</b>                         |                           |                         |                         |                         |
| 0                                                        | 51/347                    | 1.00 (0.75-1.33)        | 1.00 (0.75-1.33)        | 1.00 (0.75-1.33)        |
| 1                                                        | 39/241                    | 1.20 (0.88-1.64)        | 1.18 (0.87-1.62)        | 1.18 (0.86-1.61)        |
| 2 or more                                                | 17/150                    | 0.85 (0.53-1.37)        | 0.82 (0.51-1.32)        | 0.82 (0.51-1.33)        |
| <b>AD</b>                                                |                           |                         |                         |                         |
| <b>p for interaction between ACEs and BMI transition</b> |                           | <b>0.013</b>            | <b>0.015</b>            | <b>0.012</b>            |
| <b>Maintain obesity</b>                                  |                           |                         |                         |                         |
| 0                                                        | 23/1168                   | 1.00 (0.66-1.51)        | 1.00 (0.66-1.51)        | 1.00 (0.66-1.51)        |
| 1                                                        | 20/894                    | 1.06 (0.68-1.64)        | 1.05 (0.68-1.63)        | 1.04 (0.67-1.62)        |
| 2 or more                                                | 24/728                    | <b>1.78 (1.19-2.66)</b> | <b>1.83 (1.22-2.75)</b> | <b>1.84 (1.23-2.76)</b> |
| <b>Maintain overweight</b>                               |                           |                         |                         |                         |
| 0                                                        | 27/1312                   | 1.00 (0.68-1.48)        | 1.00 (0.68-1.48)        | 1.00 (0.68-1.48)        |
| 1                                                        | 33/996                    | 1.38 (0.98-1.95)        | 1.39 (0.99-1.95)        | 1.38 (0.98-1.94)        |

| Number of ACEs                                           | Cases/No. of participants | Model 1                 | Model 2                 | Model 3                 |
|----------------------------------------------------------|---------------------------|-------------------------|-------------------------|-------------------------|
|                                                          |                           | HR (95% CI)             |                         |                         |
| 2 or more                                                | 22/626                    | <b>1.64 (1.08-2.51)</b> | <b>1.67 (1.09-2.56)</b> | <b>1.65 (1.08-2.52)</b> |
| <b>Obesity to overweight</b>                             |                           |                         |                         |                         |
| 0                                                        | 12/223                    | 1.00 (0.55-1.81)        | 1.00 (0.54-1.87)        | 1.00 (0.54-1.86)        |
| 1                                                        | 7/188                     | 0.67 (0.32-1.40)        | 0.67 (0.33-1.40)        | 0.71 (0.34-1.47)        |
| 2 or more                                                | 6/133                     | 0.98 (0.43-2.21)        | 1.09 (0.47-2.52)        | 1.08 (0.46-2.52)        |
| <b>Overweight to obesity</b>                             |                           |                         |                         |                         |
| 0                                                        | 5/404                     | 1.00 (0.39-2.59)        | 1.00 (0.38-2.63)        | 1.00 (0.38-2.65)        |
| 1                                                        | 3/272                     | 1.13 (0.37-3.45)        | 1.09 (0.36-3.35)        | 1.12 (0.37-3.42)        |
| 2 or more                                                | 4/199                     | 2.45 (0.85-7.05)        | 2.23 (0.75-6.59)        | 2.33 (0.79-6.88)        |
| <b>Maintain normal weight</b>                            |                           |                         |                         |                         |
| 0                                                        | 64/1433                   | 1.00 (0.78-1.29)        | 1.00 (0.77-1.30)        | 1.00 (0.77-1.30)        |
| 1                                                        | 37/846                    | 0.99 (0.72-1.37)        | 1.02 (0.74-1.41)        | 1.02 (0.74-1.41)        |
| 2 or more                                                | 14/501                    | 0.69 (0.40-1.16)        | 0.73 (0.43-1.24)        | 0.73 (0.43-1.24)        |
| <b>Normal to abnormal weight</b>                         |                           |                         |                         |                         |
| 0                                                        | 9/381                     | 1.00 (0.50-1.99)        | 1.00 (0.50-2.01)        | 1.00 (0.50-2.02)        |
| 1                                                        | 8/275                     | 0.96 (0.48-1.92)        | 0.96 (0.48-1.92)        | 0.97 (0.49-1.93)        |
| 2 or more                                                | 3/175                     | 0.62 (0.20-1.96)        | 0.66 (0.21-2.09)        | 0.56 (0.16-1.92)        |
| <b>Abnormal to normal weight</b>                         |                           |                         |                         |                         |
| 0                                                        | 23/347                    | 1.00 (0.66-1.52)        | 1.00 (0.65-1.53)        | 1.00 (0.65-1.54)        |
| 1                                                        | 16/241                    | 1.11 (0.68-1.81)        | 1.05 (0.64-1.71)        | 1.00 (0.61-1.64)        |
| 2 or more                                                | 2/150                     | <b>0.24 (0.06-0.98)</b> | <b>0.22 (0.06-0.90)</b> | <b>0.22 (0.06-0.90)</b> |
| <b>Other dementias</b>                                   |                           |                         |                         |                         |
| <b>p for interaction between ACEs and BMI transition</b> |                           | 0.195                   | 0.150                   | 0.148                   |
| <b>Maintain obesity</b>                                  |                           |                         |                         |                         |
| 0                                                        | 34/1168                   | 1.00 (0.71-1.40)        | 1.00 (0.71-1.40)        | 1.00 (0.71-1.40)        |
| 1                                                        | 36/894                    | 1.29 (0.93-1.78)        | 1.27 (0.92-1.76)        | 1.27 (0.92-1.76)        |
| 2 or more                                                | 35/728                    | <b>1.71 (1.22-2.40)</b> | <b>1.70 (1.21-2.39)</b> | <b>1.71 (1.22-2.39)</b> |
| <b>Maintain overweight</b>                               |                           |                         |                         |                         |
| 0                                                        | 45/1312                   | 1.00 (0.74-1.35)        | 1.00 (0.74-1.35)        | 1.00 (0.74-1.35)        |
| 1                                                        | 50/996                    | <b>1.38 (1.05-1.82)</b> | <b>1.37 (1.04-1.81)</b> | <b>1.37 (1.04-1.81)</b> |
| 2 or more                                                | 42/626                    | <b>2.17 (1.60-2.96)</b> | <b>2.10 (1.54-2.86)</b> | <b>2.10 (1.54-2.86)</b> |
| <b>Obesity to overweight</b>                             |                           |                         |                         |                         |
| 0                                                        | 6/223                     | 1.00 (0.44-2.26)        | 1.00 (0.44-2.26)        | 1.00 (0.44-2.27)        |
| 1                                                        | 16/188                    | <b>3.31 (2.02-5.42)</b> | <b>3.48 (2.10-5.77)</b> | <b>3.31 (1.99-5.52)</b> |
| 2 or more                                                | 9/133                     | <b>3.01 (1.55-5.85)</b> | <b>2.79 (1.40-5.58)</b> | <b>2.73 (1.37-5.44)</b> |
| <b>Overweight to obesity</b>                             |                           |                         |                         |                         |
| 0                                                        | 17/404                    | 1.00 (0.61-1.65)        | 1.00 (0.61-1.65)        | 1.00 (0.61-1.65)        |
| 1                                                        | 11/272                    | 1.08 (0.60-1.93)        | 1.10 (0.61-2.00)        | 1.07 (0.59-1.94)        |
| 2 or more                                                | 9/199                     | 1.16 (0.59-2.27)        | 1.14 (0.58-2.24)        | 1.08 (0.55-2.13)        |
| <b>Maintain normal weight</b>                            |                           |                         |                         |                         |
| 0                                                        | 91/1433                   | 1.00 (0.81-1.24)        | 1.00 (0.81-1.24)        | 1.00 (0.81-1.24)        |
| 1                                                        | 51/846                    | 0.98 (0.75-1.29)        | 0.97 (0.74-1.27)        | 0.97 (0.74-1.27)        |

| Number of ACEs                   | Cases/No. of participants | Model 1          | Model 2          | Model 3          |
|----------------------------------|---------------------------|------------------|------------------|------------------|
|                                  |                           | HR (95% CI)      |                  |                  |
| 2 or more                        | 34/501                    | 1.22 (0.87-1.71) | 1.19 (0.84-1.67) | 1.18 (0.84-1.67) |
| <b>Normal to abnormal weight</b> |                           |                  |                  |                  |
| 0                                | 18/381                    | 1.00 (0.62-1.63) | 1.00 (0.61-1.63) | 1.00 (0.61-1.63) |
| 1                                | 17/275                    | 1.02 (0.64-1.64) | 0.99 (0.62-1.58) | 0.99 (0.62-1.58) |
| 2 or more                        | 11/175                    | 1.20 (0.66-2.19) | 1.09 (0.60-2.00) | 1.14 (0.62-2.10) |
| <b>Abnormal to normal weight</b> |                           |                  |                  |                  |
| 0                                | 28/347                    | 1.00 (0.68-1.46) | 1.00 (0.68-1.46) | 1.00 (0.68-1.46) |
| 1                                | 23/241                    | 1.27 (0.85-1.91) | 1.28 (0.85-1.92) | 1.29 (0.86-1.93) |
| 2 or more                        | 15/150                    | 1.36 (0.81-2.27) | 1.34 (0.80-2.24) | 1.32 (0.79-2.22) |

Notes: BMI, body mass index. ACEs, adverse childhood experiences. AD, Alzheimer's disease. other dementias, vascular dementia. HR, hazard ratio. CI, confidence interval. Model 1 was adjusted for age, sex, race, education, household income, and marital status. Model 2 was further adjusted for smoking history, drinking history, and number of chronic diseases based on model 1. Model 3 was further adjusted for baseline BMI based on Model 2. Bolded refers to statistically significant.

Table S8. Body mass index trajectory-stratified longitudinal associations of adverse childhood experiences with new-onset all-cause dementia, Alzheimer's disease, and other dementias: Cox proportional hazard regression

| Number of ACEs                                           | Cases/No. of participants | Model 1                 | Model 2                 | Model 3                 |
|----------------------------------------------------------|---------------------------|-------------------------|-------------------------|-------------------------|
|                                                          |                           | HR (95% CI)             |                         |                         |
| <b>All-cause dementia</b>                                |                           |                         |                         |                         |
| <b>p for interaction between ACEs and BMI trajectory</b> |                           | <b>0.006</b>            | <b>0.005</b>            | <b>0.005</b>            |
| <b>Maintain obesity</b>                                  |                           |                         |                         |                         |
| 0                                                        | 58/1176                   | 1.00 (0.77-1.30)        | 1.00 (0.77-1.30)        | 1.00 (0.77-1.30)        |
| 1                                                        | 63/897                    | <b>1.34 (1.05-1.72)</b> | <b>1.34 (1.05-1.71)</b> | <b>1.34 (1.04-1.71)</b> |
| 2 or more                                                | 61/719                    | <b>1.84 (1.43-2.38)</b> | <b>1.85 (1.43-2.39)</b> | <b>1.87 (1.45-2.42)</b> |
| <b>Maintain overweight</b>                               |                           |                         |                         |                         |
| 0                                                        | 136/2288                  | 1.00 (0.84-1.19)        | 1.00 (0.84-1.19)        | 1.00 (0.84-1.19)        |
| 1                                                        | 138/1718                  | <b>1.24 (1.05-1.47)</b> | <b>1.24 (1.05-1.46)</b> | <b>1.23 (1.05-1.46)</b> |
| 2 or more                                                | 102/1134                  | <b>1.62 (1.33-1.97)</b> | <b>1.59 (1.30-1.94)</b> | <b>1.59 (1.30-1.94)</b> |
| <b>Decline to normal weight</b>                          |                           |                         |                         |                         |
| 0                                                        | 28/114                    | 1.00 (0.67-1.48)        | 1.00 (0.67-1.49)        | 1.00 (0.67-1.49)        |
| 1                                                        | 18/85                     | 0.80 (0.51-1.27)        | 0.78 (0.49-1.25)        | 0.78 (0.49-1.24)        |
| 2 or more                                                | 8/50                      | 0.68 (0.34-1.38)        | 0.67 (0.33-1.34)        | 0.66 (0.32-1.33)        |
| <b>Maintain normal weight</b>                            |                           |                         |                         |                         |
| 0                                                        | 178/1661                  | 1.00 (0.86-1.16)        | 1.00 (0.86-1.17)        | 1.00 (0.86-1.17)        |
| 1                                                        | 109/996                   | 1.06 (0.88-1.28)        | 1.06 (0.88-1.28)        | 1.06 (0.88-1.28)        |
| 2 or more                                                | 57/599                    | 0.99 (0.76-1.29)        | 1.00 (0.77-1.30)        | 1.00 (0.77-1.30)        |
| <b>AD</b>                                                |                           |                         |                         |                         |
| <b>p for interaction between ACEs and BMI trajectory</b> |                           | <b>0.020</b>            | <b>0.024</b>            | <b>0.020</b>            |
| <b>Maintain obesity</b>                                  |                           |                         |                         |                         |
| 0                                                        | 23/1176                   | 1.00 (0.66-1.51)        | 1.00 (0.66-1.52)        | 1.00 (0.66-1.52)        |
| 1                                                        | 24/897                    | 1.30 (0.87-1.93)        | 1.31 (0.88-1.94)        | 1.29 (0.87-1.92)        |
| 2 or more                                                | 23/719                    | <b>1.76 (1.16-2.66)</b> | <b>1.81 (1.19-2.74)</b> | <b>1.85 (1.22-2.80)</b> |
| <b>Maintain overweight</b>                               |                           |                         |                         |                         |
| 0                                                        | 52/2288                   | 1.00 (0.75-1.32)        | 1.00 (0.75-1.33)        | 1.00 (0.75-1.33)        |
| 1                                                        | 47/1718                   | 1.03 (0.77-1.36)        | 1.03 (0.77-1.37)        | 1.02 (0.77-1.36)        |
| 2 or more                                                | 35/1134                   | 1.32 (0.95-1.85)        | 1.35 (0.96-1.89)        | 1.35 (0.96-1.90)        |
| <b>Decline to normal weight</b>                          |                           |                         |                         |                         |
| 0                                                        | 13/114                    | 1.00 (0.57-1.75)        | 1.00 (0.56-1.79)        | 1.00 (0.53-1.90)        |
| 1                                                        | 8/85                      | 0.80 (0.39-1.66)        | 0.75 (0.36-1.55)        | 0.67 (0.33-1.35)        |
| 2 or more                                                | 1/50                      | 0.21 (0.03-1.52)        | 0.21 (0.03-1.49)        | 0.16 (0.02-1.19)        |
| <b>Maintain normal weight</b>                            |                           |                         |                         |                         |
| 0                                                        | 74/1661                   | 1.00 (0.79-1.27)        | 1.00 (0.79-1.27)        | 1.00 (0.79-1.27)        |
| 1                                                        | 45/996                    | 1.03 (0.77-1.38)        | 1.04 (0.78-1.40)        | 1.04 (0.78-1.39)        |
| 2 or more                                                | 15/599                    | 0.62 (0.37-1.04)        | 0.64 (0.39-1.07)        | 0.64 (0.39-1.07)        |
| <b>Other dementias</b>                                   |                           |                         |                         |                         |
| <b>p for interaction between ACEs and BMI trajectory</b> |                           | 0.317                   | 0.286                   | 0.281                   |
| <b>Maintain obesity</b>                                  |                           |                         |                         |                         |

| Number of ACEs                  | Cases/No. of participants | Model 1                 | Model 2                 | Model 3                 |
|---------------------------------|---------------------------|-------------------------|-------------------------|-------------------------|
|                                 |                           | HR (95% CI)             |                         |                         |
| 0                               | 35/1176                   | 1.00 (0.72-1.40)        | 1.00 (0.72-1.40)        | 1.00 (0.72-1.40)        |
| 1                               | 39/897                    | 1.36 (1.00-1.87)        | 1.35 (0.99-1.85)        | 1.35 (0.99-1.85)        |
| 2 or more                       | 38/719                    | <b>1.85 (1.34-2.55)</b> | <b>1.84 (1.33-2.55)</b> | <b>1.85 (1.34-2.57)</b> |
| <b>Maintain overweight</b>      |                           |                         |                         |                         |
| 0                               | 84/2288                   | 1.00 (0.80-1.25)        | 1.00 (0.80-1.25)        | 1.00 (0.80-1.25)        |
| 1                               | 91/1718                   | <b>1.37 (1.12-1.68)</b> | <b>1.36 (1.11-1.67)</b> | <b>1.36 (1.11-1.66)</b> |
| 2 or more                       | 67/1134                   | <b>1.77 (1.39-2.26)</b> | <b>1.70 (1.33-2.17)</b> | <b>1.70 (1.33-2.18)</b> |
| <b>Decline to normal weight</b> |                           |                         |                         |                         |
| 0                               | 15/114                    | 1.00 (0.59-1.70)        | 1.00 (0.59-1.70)        | 1.00 (0.59-1.70)        |
| 1                               | 10/85                     | 0.84 (0.45-1.56)        | 0.82 (0.44-1.53)        | 0.81 (0.43-1.51)        |
| 2 or more                       | 7/50                      | 1.07 (0.50-2.28)        | 1.07 (0.50-2.27)        | 1.08 (0.51-2.30)        |
| <b>Maintain normal weight</b>   |                           |                         |                         |                         |
| 0                               | 103/1661                  | 1.00 (0.82-1.22)        | 1.00 (0.82-1.22)        | 1.00 (0.82-1.22)        |
| 1                               | 64/996                    | 1.08 (0.85-1.38)        | 1.08 (0.85-1.38)        | 1.08 (0.85-1.38)        |
| 2 or more                       | 42/599                    | 1.29 (0.95-1.74)        | 1.27 (0.93-1.72)        | 1.26 (0.93-1.72)        |

Notes: ACEs, adverse childhood experiences. BMI, body mass index. AD, Alzheimer's disease. HR, hazard ratio. CI, confidence interval. Model 1 was adjusted for age, sex, race, education, household income, and marital status. Model 2 was further adjusted for smoking history, drinking history, and number of chronic diseases based on model 1. Model 3 was further adjusted for baseline BMI based on Model 2. Bolded refers to statistically significant.
